# Supplementary material for: Top-down fabrication of three-dimensional porous V2O5 hierarchical microplates with tunable porosity for improved lithium battery performance
Source: Royal Society of Chemistry journal article supplement (doi:10.1039/c3ta14818a), 2013-12-13
Supplement: c3ta14818a.pdf [file c3ta14818a.pdf]

Supplementary Information for

## **Top-Down Fabrication of Three-Dimensional Porous V<sub>2</sub>O<sub>5</sub> Hierarchical Microplates with Tunable Porosity for Improved Lithium Batteries<sup>†</sup>**

**Qinyou An,<sup>‡</sup> Pengfei Zhang,<sup>‡</sup> Qiulong Wei, Liang He, Fangyu Xiong, Jinzhi Sheng, Qinqin Wang and Liqiang Mai\***

<sup>a</sup> State Key Laboratory of Advanced Technology for Materials Synthesis and Processing, WUT-Harvard Joint Nano Key Laboratory, School of Materials Science and Engineering, Wuhan University of Technology, Wuhan 430070, P. R. China. Fax: +86-27-87644867; Tel: +86-27-87467595; E-mail: mlq518@whut.edu.cn

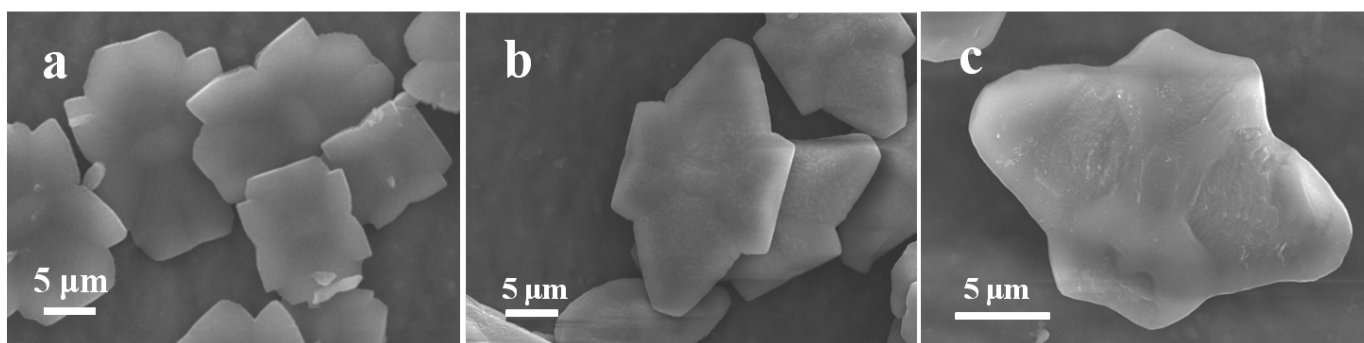

**Figure S1.** SEM images of the samples synthesized under different solvothermal times: (a) 0 h, (b) 6 h and (c) 12 h.

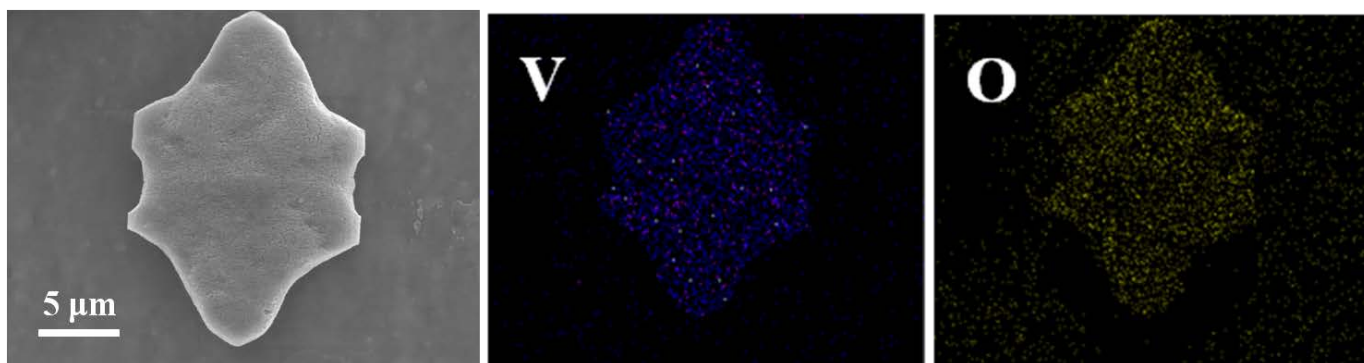

**Figure S2.** EDS mapping of the porous  $V_2O_5$  hierarchical microplate.

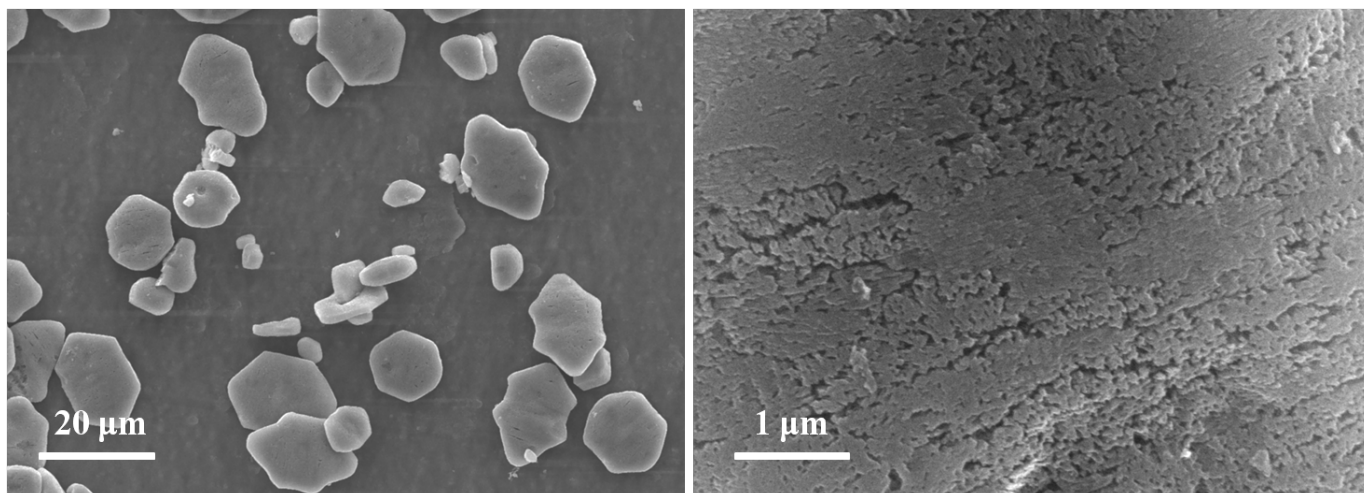

**Figure S3.** SEM images of the porous  $V_2O_5$  hierarchical microplates calcinated at 350 °C.

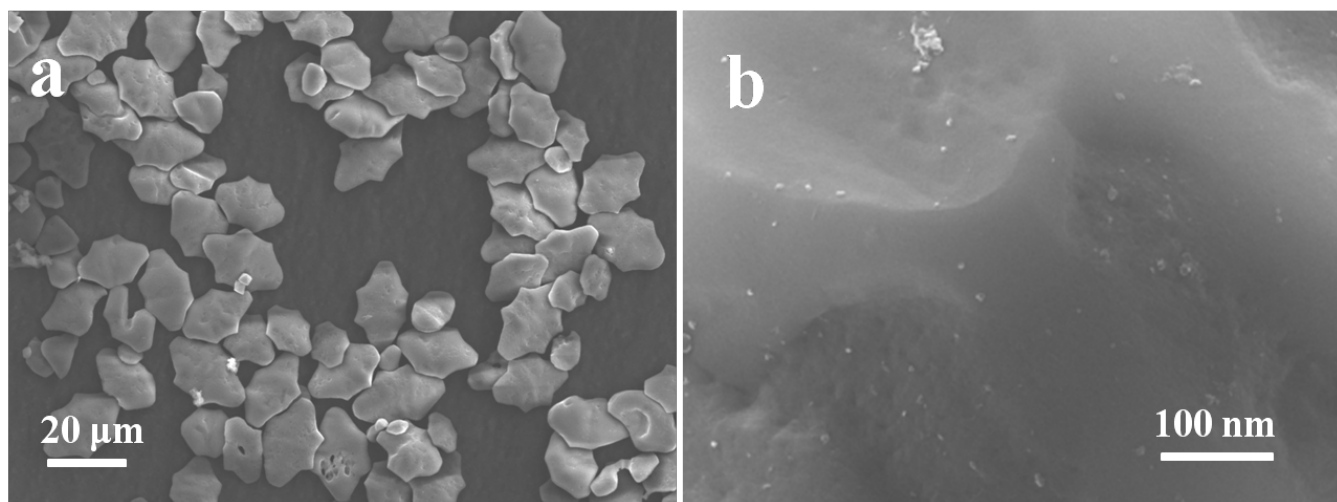

**Figure S4.** SEM images of  $\text{NH}_4\text{VO}_3$  microplates.

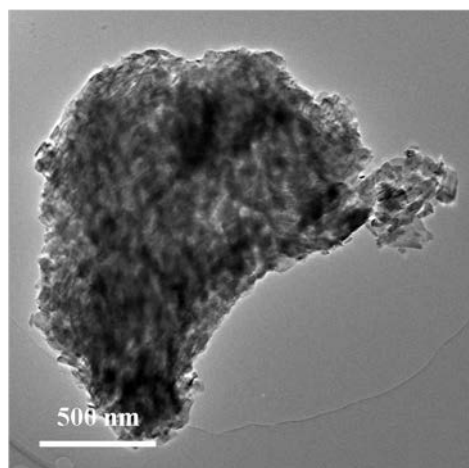

**Figure S5.** TEM image of irregular  $\text{V}_2\text{O}_5$  particle.

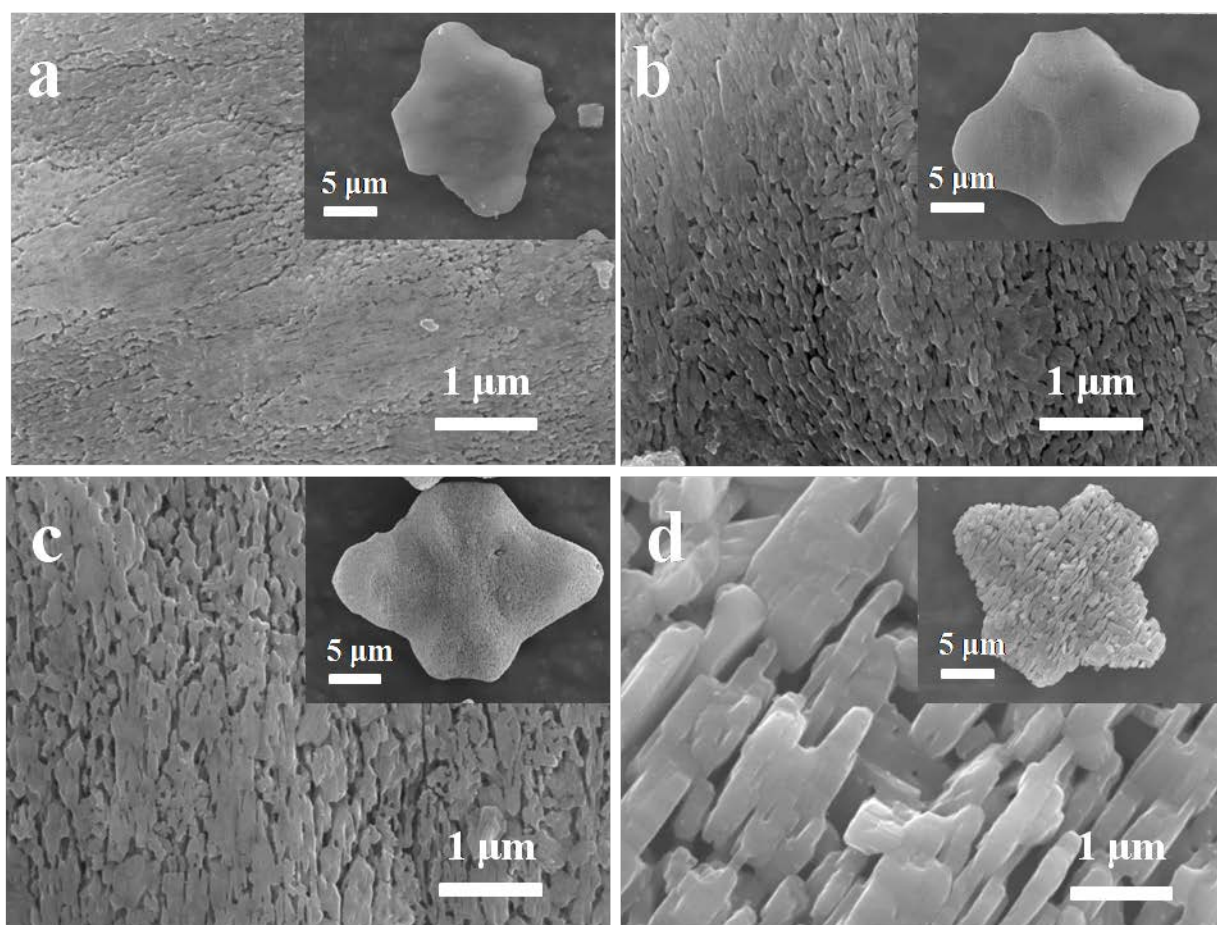

**Figure S6.** SEM images of quasi-hexagonal microplates annealed at 400 °C (a), 450 °C (b), 500 °C (c) and 600 °C (d).

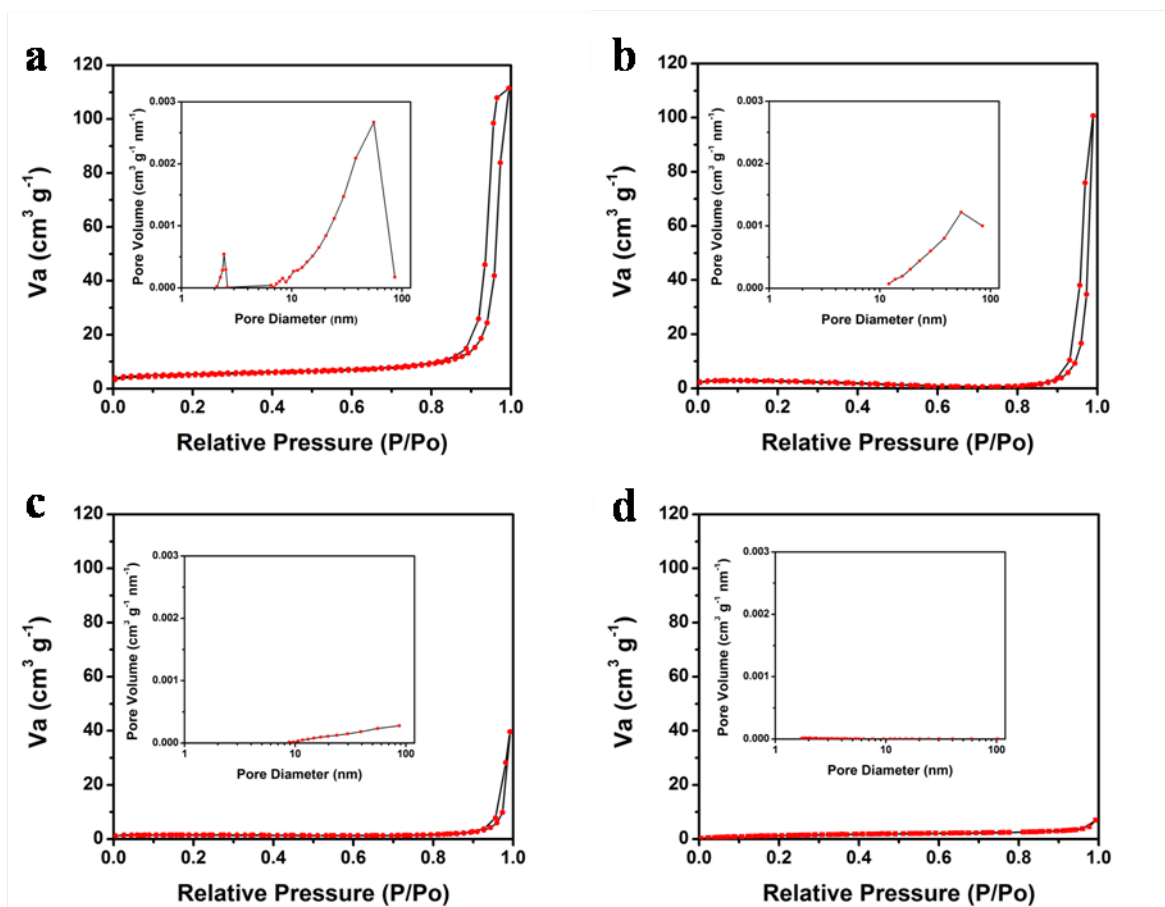

**Figure S7.** Nitrogen adsorption-desorption isotherms of porous  $\text{V}_2\text{O}_5$  microplates and corresponding pore size distribution (inset) annealed at 400 °C (a), 450 °C (b), 500 °C (c) and 600 °C (d).

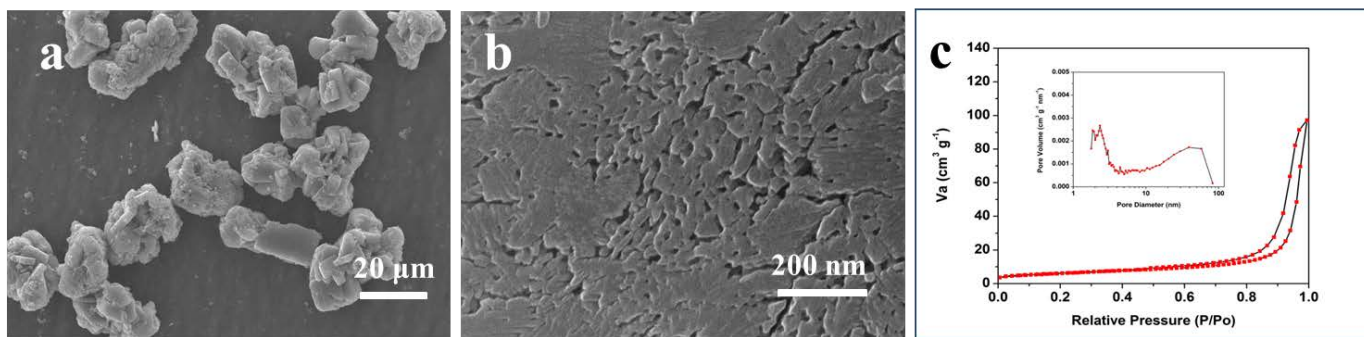

**Figure S8.** (a, b) SEM images of the sample obtained by calcining the bulk  $\text{NH}_4\text{VO}_3$  at 350 °C; (c) Nitrogen adsorption-desorption isotherms of the sample and corresponding pore size distribution (inset).

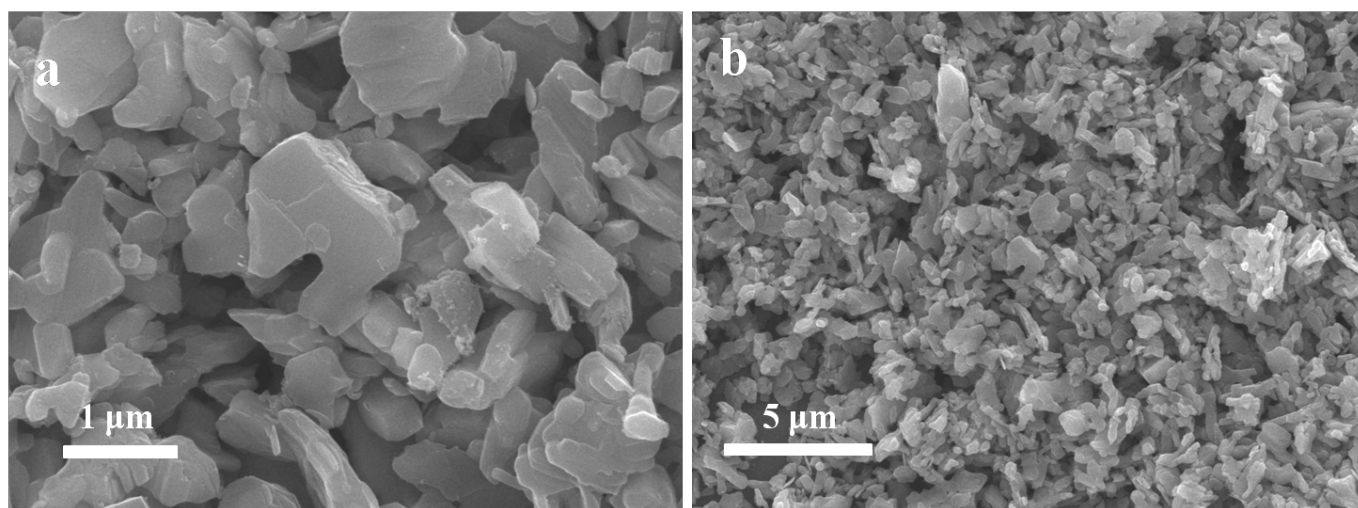

Figure S9. SEM images of the bulk  $V_2O_5$ .

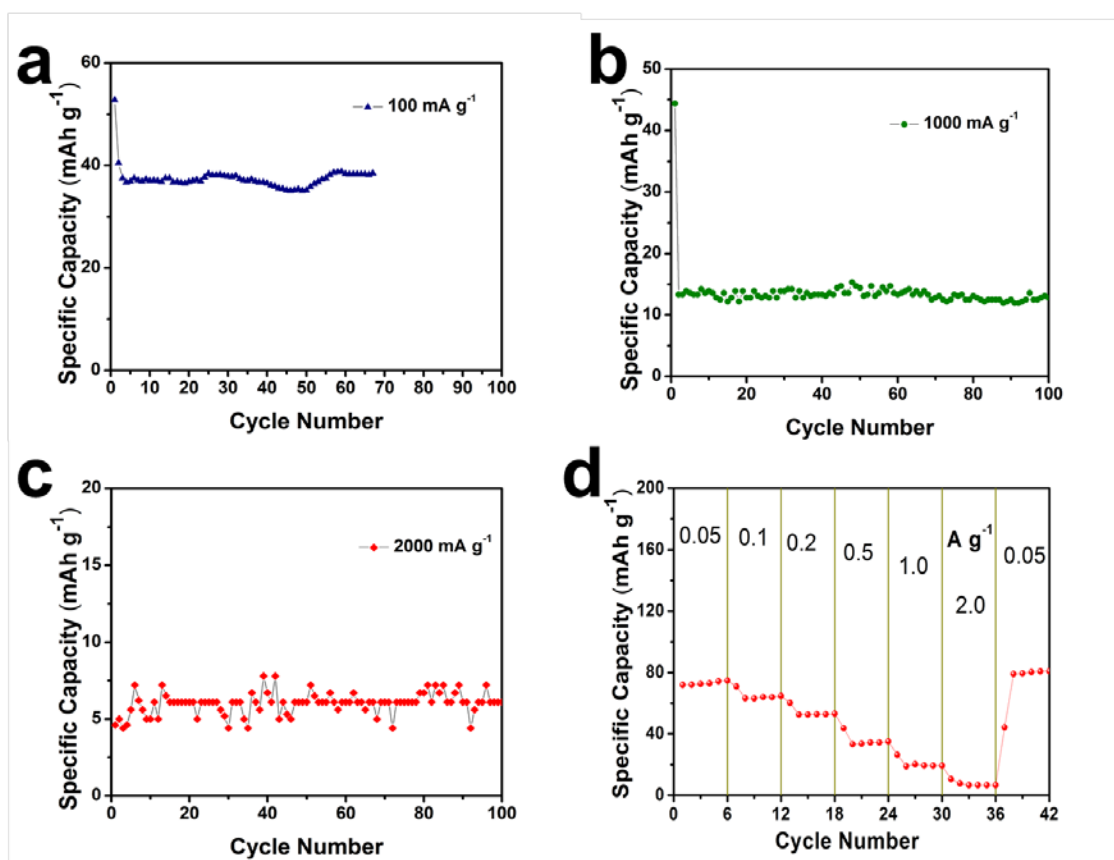

Figure S10. Electrochemical characterizations of the bulk  $V_2O_5$ : cycling performance at the current densities of  $100 \text{ mA g}^{-1}$  (a),  $1000 \text{ mA g}^{-1}$  (b), and  $2000 \text{ mA g}^{-1}$  (c); (d) The rate performance.

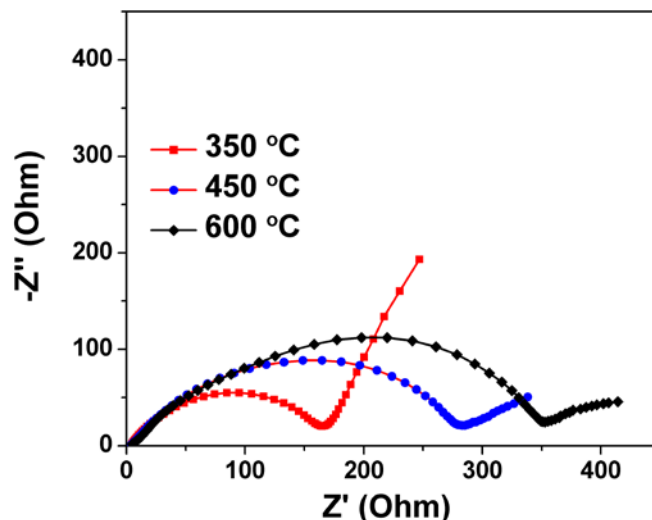

**Figure S11.** AC-impedance spectra of  $V_2O_5$  electrodes prepared under different annealing temperatures.

**Table S1.** The electrochemical performances (cycling performance at relevant current rate or density, and rate capability) of the 3D porous  $V_2O_5$  hierarchical microplates and the reported  $V_2O_5$  materials.

| Sample                                                               | Voltage range | Capacity (mAh $g^{-1}$ )/Cycle number | Current rate or density | Rate capacity (mAh $g^{-1}$ ) at relevant current rate or density |
|----------------------------------------------------------------------|---------------|---------------------------------------|-------------------------|-------------------------------------------------------------------|
| As-prepared 3D porous $V_2O_5$ hierarchical microplates in this work | 2.4 – 4 V     | 123/100                               | 1 A $g^{-1}$            | 112 at 2 A $g^{-1}$                                               |
| $V_2O_5$ microspheres <sup>1</sup>                                   | 2.5 – 4 V     | ~ 135/100                             | ~ 0.3 A $g^{-1}$        | 92.2 at 2.25 A $g^{-1}$                                           |
| $V_2O_5$ /CNTs composites <sup>2</sup>                               | 2 – 4 V       | 104/200                               | 0.75 A $g^{-1}$         | 169 at 1.5 A $g^{-1}$                                             |
| Porous $V_2O_5$ nanotubes <sup>3</sup>                               | 2.5 – 4 V     | 105/250                               | 2 A $g^{-1}$            | 62.5 at 15 A $g^{-1}$                                             |
| 3D porous $V_2O_5$ <sup>4</sup>                                      | 2.5 – 4 V     | 110/200                               | 1.5 A $g^{-1}$          | 86.7 at 8.4 A $g^{-1}$<br>(Charge at 0.15 A $g^{-1}$ )            |
| $V_2O_5$ nanofibers <sup>5</sup>                                     | 2.5 – 4 V     | 127/30                                | 0.02 A $g^{-1}$         | no given                                                          |

## References

- 1 S. Q. Wang, Z. D. Lu, D. Wang, C. G. Li, C. H. Chen and Y. D. Yin, *J. Mater. Chem.*, 2011, **21**, 6365.
- 2 X. Jia, Z. Chen, A. Suwarnasarn, L. Rice, X. Wang, H. Sohn, Q. Zhang, B. M. Wu, F. Wei and Y. Lu, *Energy Environ. Sci.*, 2012, **5**, 6845.
- 3 H. G. Wang, D. L. Ma, Y. Huang and X. B. Zhang, *Chem. Eur. J.*, 2012, **18**, 8987.
- 4 S. Q. Wang, S. R. Li, Y. Sun, X. Y. Feng and C. H. Chen, *Energy Environ. Sci.*, 2011, **4**, 2854.
- 5 Y. L. Cheah, V. Aravindan and S. Madhavi, *ACS Appl. Mater. Interfaces*, 2013, **5**, 3475.
